## 28 **Abstract**

### 29 **Background**

30 The combustion of solid fuels (e.g., wood, coal, and charcoal) for cooking fuel is widespread  
31 in low- and middle-income countries. The use of these fuels increases exposure to airborne  
32 pollutants which have been shown to increase the risk of disease and premature death,  
33 particularly among older individuals. Despite this, most studies examining this association  
34 come from India and China. Furthermore, few studies have examined this association  
35 among the elderly. This study aims to fill this gap by examining the association between  
36 household cooking fuel and chronic respiratory disease.

### 37 38 **Methods**

39 We analyzed data from Wave 2 of the World Health Organization's Study on Global Ageing  
40 and Adult Health. Our study sample consists of 7,253 adults aged 50+ from Mexico and  
41 Ghana. Logistic regression was conducted to study the association between chronic  
42 respiratory disease (measured by whether the participant reported having either (1) a  
43 medical diagnosis for chronic obstructive pulmonary disorder, chronic bronchitis, or  
44 emphysema, or (2) symptoms suggesting chronic lung infection), and the main cooking fuel  
45 used by the household.

### 46 47 **Results**

48 The prevalence of chronic respiratory disease was 6.55% and 17.45% for Ghana and  
49 Mexico, respectively. 15.96%, and 22.47% of participants lived in households using solid  
50 fuels for cooking. Adjusting for covariates, solid fuel use was associated with 1.72 (95%CI:  
51 1.07-2.79;  $p=0.026$ ) times higher odds of chronic respiratory disease. Regional disparities  
52 were found, with individuals in Mexico and Ghana respectively having 1.70 (95%CI:1.01-  
53 2.89;  $p=0.049$ ) and 3.40 (95%CI:1.50-7.72;  $p=0.004$ ) higher adjusted odds for chronic  
54 respiratory disease.

### 55 56 **Conclusions**

57 Our results confirm the association found between the use of solid fuels and increased  
58 chronic respiratory disease risk. These findings demonstrate the salience of improving  
59 access to clean cooking fuels and methods, especially for households in the sub-Saharan  
60 region, particularly, women. Policy interventions need to capture the unique needs of women  
61 to ensure that health outcomes from energy use are well-mitigated.

62

63

## 64 Introduction

65 In 2017 alone, chronic respiratory diseases (CRDs) were responsible for almost 4  
66 million deaths globally and a further 1,470 disability life-adjusted years (DALYs) per 100,000.  
67 The World Health Organizations (WHO) classifies CRDs as a group of diseases that affect  
68 the airways and the lungs, including diseases such as asthma, chronic obstructive  
69 pulmonary disorder (COPD), and pulmonary hypertension (1,2). They are characterized by  
70 symptoms that include persistent cough, wheezing, dyspnea, and sputum production (3,4).  
71 CRDs are also further responsible for major economic losses; in the United States, for  
72 example, the mean annual indirect costs of COPD alone were estimated to range between  
73 US\$1,525-\$3,340 per person in 2010 dollars (5). However, the economic and societal  
74 burden of CRDs are borne disproportionately by low- and middle-income countries (LMICs)  
75 (6,7).

76 The WHO has listed COPD and asthma as the most common CRDs (8). COPD is a  
77 chronic inflammatory disease of the lungs having an estimated global prevalence between  
78 11.7% (9) and 12.2% (10). Both studies producing these estimates found that the Americas  
79 had the higher prevalence (approximately 15%) compared to Africa (about 10%), but both  
80 studies attribute this disparity to the absence of studies examining COPD in the latter region.  
81 A 2015 review further attributed this disparity to lower awareness and subsequent  
82 underdiagnosis of COPD in these regions (11), which was shown to be a persistent issue as  
83 recently as 2019 (12–14). Asthma is a CRD characterized by episodes of wheezing,  
84 coughing, shortness of breath, and chest tightness, triggered by factors such as strenuous  
85 physical activity or exposure to airborne pollutants (15,16). While asthma is typically  
86 diagnosed in early age, a diagnosis can occur at any stage in life (15), with adult-onset  
87 asthma associated with moderate to severe symptoms (17,18). A review of over 200  
88 population-based studies from over 80 countries estimated the global prevalence of asthma

89 in 2019 was 9.8% (19). This review also found that the African region had the highest  
90 prevalence among individuals aged 5-69 at 11.3%, and had the highest prevalence of  
91 current wheezing symptoms 13.2% (compared to 11.5% globally). While COPD and asthma  
92 are CRDs that have received the most attention, other diseases such as occupational lung  
93 disease (20) and pulmonary hypertension (21) are no less debilitating, but have been shown  
94 by prior research to be underdiagnosed, especially among older adults.

95         The considerable prevalence of CRDs worldwide masks the equally consequential  
96 impact of their symptoms on the quality of life especially on older adults. A 2019 longitudinal  
97 study of 1,000 Korean adults (age 65+) found that chronic cough was associated with over 3  
98 times higher odds of having a depression diagnosis, measured through the Geriatric  
99 Depression Scale (GDS) and the Center for Epidemiologic Studies Depression Scale (CES-  
100 D) (22). A 2016 study of 887 Portuguese older adults found that reporting wheezing in the  
101 past 12-months was associated with 2.03 higher odds reporting lower quality of life, as  
102 measured by the World Health Organization QOL questionnaire (23). These findings suggest  
103 that the impact of CRD symptoms on quality of life can be as critical, if not more so, than the  
104 clinical diagnosis of the disease itself.

105         Lifestyle factors have been shown to be significant risk factors for CRDs. For  
106 example, current cigarette smokers have consistently been shown to have higher risk for  
107 both diagnosis and symptoms of CRDs (24–26). Environmental factors, such as pollution,  
108 have also been shown to contribute to significantly higher CRD risk. For example, among  
109 2,397 elderly adults from South Africa, individuals living within a 2 km radius of a mine dump  
110 had 1.57, 2.02, and 2.01 higher odds respectively of asthma, chronic cough, and wheezing  
111 compared to those living 5 km away or more (27). A large-scale cohort study in Ontario with  
112 5.1 million adults aged 35-85 and utilizing linked administrative data in Ontario found that  
113 each unit increase of common pollutants - PM<sub>2.5</sub>, NO<sub>x</sub>, and O<sub>3</sub> - was respectively  
114 associated with 1.07, 1.04, and 1.04 times higher risk of developing COPD. This association  
115 was based on exposure levels calculated as a three-year moving average (28). Exposure to

116 these airborne pollutants and heightened CRD risk is thought to be driven by inflammation. A  
117 2014 study found that exposure to ambient air pollution resulted in increases in biomarkers  
118 of inflammation, specifically, a 51% increase c-reactive protein, and 12% increase in  
119 interleukin-6. Prolonged exposure to these pollutants, and subsequent inflammation, have  
120 been shown to be associated with potentially irreversible changes to lung tissue (29,30).

121 The correlation between environmental pollution and CRD risk motivates the  
122 examination of household air pollution on CRDs given the overlap of pollutants in both of  
123 these contexts (31–33). Furthermore, the widespread practice of the combustion of solid  
124 fuels (such as, wood, coal, charcoal) and kerosene in many LMICs is a major source of  
125 household air pollution (31,34,35) and has been linked to heightened risk of CRDs in these  
126 regions (35–39). The majority of the extant literature examining this association is based on  
127 studies conducted in China and India, with fewer studies from other LMICs in regions such  
128 as sub-Saharan Africa or Central America. This gap underscores the importance of  
129 examining this association in countries like Ghana with its high prevalence of solid fuel use.  
130 A 2015 study of 8,267 Ghanaian households found that less than 10% of participants  
131 reported using liquified natural gas (LNG) or electricity to cook (40). This study additionally  
132 found that over 57% of respondents cooked with firewood and almost 30% with charcoal. In  
133 contrast, a study of 14,245 adults aged 50+ in Mexico found that while the overwhelming  
134 majority (81.75%) of respondents cooked exclusively with LNG, about 10% of respondents  
135 cooked primarily or exclusively used solid fuels such as wood (41). These contrasting fuel  
136 usage patterns in Ghana and Mexico provide a unique comparative perspective to explore  
137 the impact of different cooking fuels on the prevalence and severity of CRD symptoms.  
138 Policymakers can use this information to develop targeted interventions, such as promoting  
139 cleaner cooking fuels and improving ventilation in homes, in these contexts.

140 This study utilizes a population-representative sample of adults aged 50 and above  
141 from two countries in West Africa (Ghana) and North America (Mexico) respectively to  
142 investigate the relationship between the type of cooking fuel used and the prevalence of

143 symptoms associated with chronic lung diseases (CLDs). Drawing on existing research, we  
144 hypothesize that individuals residing in households where solid fuels and kerosene are the  
145 primary cooking fuels have a higher likelihood of exhibiting symptoms indicative of CLDs.  
146 This hypothesis is grounded in the understanding that exposure to emissions from these  
147 fuels may contribute significantly to the development or exacerbation of respiratory  
148 conditions.

## 149 **Materials and methods**

### 150 **Study design and participants.**

151 We conducted a cross-sectional analysis of Wave 2 (2014-2015) from the Study on  
152 Global AGEing and Adult Health (SAGE), pooling samples from Ghana and Mexico. The  
153 SAGE is an ongoing, WHO-initiated study examining health and other characteristics among  
154 older adults from 6 participating countries including Ghana and Mexico (42). Wave 2 is the  
155 most currently available (as of the time of writing) data from Mexico and Ghana. The survey  
156 was conducted by trained interviewers, and the representativeness of the sample to each  
157 country's social, economic, and demographic constitution was ensured through multistage  
158 cluster sampling and subsequent sampling weights computed for each individual. To ensure  
159 generalizability, all analyses in this study were conducted with the application of these  
160 weights.

### 161 **Ethics and permissions**

162 Data from SAGE Ghana wave 2 and SAGE Mexico wave 2 were used for this study. WHO  
163 Ethics Review Committee (reference number RPC149) with local approval from the  
164 University of Ghana Medical School Ethics and Protocol Review Committee. The Ethics and  
165 Research Committees of the National Institute of Public Health in Mexico approved the  
166 Mexico SAGE data. All participants were provided with a detailed explanation of study

167 procedures and signed an informed consent letter. The necessary permission was obtained  
168 from the World Health Organization to use these data.

## 169 **Outcome**

170 The outcome of this study was having symptoms or medical diagnosis of a CRD.  
171 This was determined through four questions in the study, through which respondents were  
172 given the option of answering yes or no: [1] “Have you ever been diagnosed with chronic  
173 respiratory disease (emphysema, bronchitis, COPD)?”, [2] “During the last 12 months, have  
174 you experienced any shortness of breath at rest? (while awake)”, [3] “During the last 12  
175 months, have you experienced any coughing or wheezing for ten minutes or more at a  
176 time?”, [4] “During the last 12 months, have you experienced any coughing up sputum or  
177 phlegm for most days of the month for at least 3 months?”. Respondents were considered to  
178 have a chronic respiratory disease if they responded “yes” to at least one of questions [1] -  
179 [4], and in contrast, were considered to not have a chronic respiratory disease if they  
180 responded “no” to all of questions [1] - [4]. This is similar to other studies that have examined  
181 chronic respiratory disease using SAGE (43). The use of symptoms as indicators of CRDs,  
182 rather than spirometry readings, was informed by evidence from prior studies indicating that  
183 individuals may still experience debilitating respiratory symptoms, even with normal  
184 spirometry measurements (44,45). Additionally, the presence of these symptoms has been  
185 demonstrated to be highly predictive of future mortality and morbidity (46), lending further  
186 credibility to their importance in assessing CRDs.

## 187 **Exposure**

188 The exposure of interest in this study was the type of cooking fuel primarily used in  
189 the respondent’s home through the question “What type of fuel does your household mainly  
190 use for cooking?” Respondents could choose from options including gas, electricity,  
191 kerosene/paraffin, or solid fuels and biomass such as coal/charcoal, animal dung, wood, or

192 other plant matter. The responses were then categorized into two groups for analysis: one  
193 group for those using gas or electricity, and another group comprising all other options.

## 194 **Covariates**

195 Multivariate models included adjustments for the following variables: sex, age, rural-  
196 urban status, education, waist-to-hip ratio, and smoking status. In addition to socio-  
197 demographic characteristics (sex and age), rural/urban status and education were included  
198 as measures of socio-economic characteristics. Smoking status (current, former, non-  
199 smoker, and not stated) was included as both a physical health indicator (47–50) and its role  
200 as a major risk factor for CRDs (51,52). Continuous waist-to-hip ratio was included as an  
201 additional physical health indicator (53,54).

202 Adjusted models also included adjustments for cooking space to account for  
203 differences in exposure. Respondents who indicated that they cooked with solid fuels were  
204 further asked: “Where is cooking usually done?”, with possible responses 1 “In a room used  
205 for living or sleeping”, 2 “In a separate room used as kitchen”, 3 “In a separate building used  
206 as kitchen”, 4 “Outdoor”, or 7 “Other, specify:”. This covariate was coded into a binary  
207 category where respondents who indicated that they cooked in the same room used for  
208 living or sleeping were included in one category, and other responses in the other category.

## 209 **Statistical analyses**

210 A series of logistic regression analyses to explore the relationship between primary  
211 household cooking fuel and the odds of CRD. These analyses were conducted using both  
212 unadjusted and adjusted models, with each analysis stratified by country. Adjusted models  
213 were further stratified by sex, recognizing the historically greater exposure to cooking fuels  
214 that women experience due to traditional gender roles in Ghana and Mexico.

215 As part of our preliminary analysis, we calculated the Intraclass Correlation  
216 Coefficient (ICC) to assess the degree of clustering of CRDs within countries. The ICC  
217 quantifies the proportion of total variance in the outcome (reporting symptoms of CRDs) that



218 is attributable to differences between groups at the country level. The ICC was calculated  
219 using a null model — a multilevel logistic regression model with no predictors except for the  
220 random intercepts for countries. This model partitions the variance into within-country and  
221 between-country components. We considered an ICC value greater than 0.40 as indicative  
222 of sufficient between-country variance to warrant multilevel modeling based on prior  
223 literature (55,56).

224 In our analysis, descriptive tables were generated to illustrate the distribution of  
225 sample characteristics, stratified both by the outcome status and by country. We evaluated  
226 the bivariate associations between each characteristic and the outcome using the chi-square  
227 test for categorical variables and the F-test for continuous variables. The threshold for  
228 statistical significance was set at a 5% confidence level across all analyses. All statistical  
229 procedures were conducted using STATA 18 (57).

## 230 **Results**

### 231 **Sample characteristics.**

232 Table 1 describes our study sample by CRD status, with further detailed breakdown  
233 by country. Our overall study sample consists of 7,243 adults aged 50+ from Mexico and  
234 Ghana weighted to represent 23,073,224 individuals. For brevity, the sample characteristics  
235 for the sample combining Mexico and Ghana are presented in in S1 table, and only the  
236 breakdown by country are presented in our main results. Table 1 presents unweighted  
237 counts for transparency, but proportions and p-values were calculated using weighted values  
238 to ensure representativeness to their respective countries. The overall prevalence of CRDs  
239 was 15.96%. By country, the prevalence of CRDs in Ghana was 6.55%, but this rate was  
240 almost triple in Mexico at 17.54%.

241

242

243

244 **Table 1. Sample characteristics chronic respiratory disease status, with further breakdown by country (unweighted N=7,243; weighted**  
 245 **N=23,073,224)**

| Mexico and Ghana            |                                                         |                |                                                          |                |                   |                |          |
|-----------------------------|---------------------------------------------------------|----------------|----------------------------------------------------------|----------------|-------------------|----------------|----------|
|                             | No Diagnosis or Symptoms of chronic respiratory disease |                | Has Diagnosis or Symptoms of chronic respiratory disease |                | Total             |                | p-values |
|                             | Unweighted Counts                                       | Weighted Row % | Unweighted Counts                                        | Weighted Row % | Unweighted Counts | Weighted Row % |          |
| <b>Totals</b>               | 6,346                                                   | 84.04%         | 897                                                      | 15.96%         | 7,243             | 100.00%        |          |
|                             | Unweighted Counts                                       | Weighted Col % | Unweighted Counts                                        | Weighted Col % | Unweighted Counts | Weighted Col % |          |
| <b>Cooking Fuel</b>         |                                                         |                |                                                          |                |                   |                | 0.0008   |
| Wood/Charcoal/Coal/Kerosene | 3,184                                                   | 23.71%         | 311                                                      | 15.75%         | 3,495             | 22.44%         |          |
| Gas/Electricity             | 3,162                                                   | 76.29%         | 586                                                      | 84.25%         | 3,748             | 77.56%         |          |
| Ghana Only                  |                                                         |                |                                                          |                |                   |                |          |
|                             | No Diagnosis or Symptoms of chronic respiratory disease |                | Has Diagnosis or Symptoms of chronic respiratory disease |                | Total             |                | p-values |

|                                     | <b>Unweighted<br/>Counts</b> | <b>Weighted Row %</b> | <b>Unweighted<br/>Counts</b> | <b>Weighted Row %</b> | <b>Unweighted<br/>Counts</b> | <b>Weighted Row %</b> |        |
|-------------------------------------|------------------------------|-----------------------|------------------------------|-----------------------|------------------------------|-----------------------|--------|
| <b>Totals</b>                       | 3,092                        | 93.45%                | 248                          | 6.55%                 | 3,340                        | 100.00%               |        |
|                                     | <b>Unweighted<br/>Counts</b> | <b>Weighted Col %</b> | <b>Unweighted<br/>Counts</b> | <b>Weighted Col %</b> | <b>Unweighted<br/>Counts</b> | <b>Weighted Row %</b> |        |
| <b>Cooking Fuel</b>                 |                              |                       |                              |                       |                              |                       | 0.0005 |
| Wood/Charcoal/Coal/Kerosene         | 2,773                        | 86.85%                | 235                          | 95.08%                | 3,008                        | 87.39%                |        |
| Gas/Electricity                     | 319                          | 13.15%                | 13                           | 4.92%                 | 332                          | 12.61%                |        |
| <b>Cooking Space</b>                |                              |                       |                              |                       |                              |                       | 0.0033 |
| Shared with Living/Sleeping Space   | 18                           | 0.58%                 | 7                            | 2.55%                 | 25                           | 0.71%                 |        |
| Separate from Living/Sleeping Space | 3,074                        | 99.42%                | 241                          | 97.45%                | 3,315                        | 99.29%                |        |
| <b>Sex</b>                          |                              |                       |                              |                       |                              |                       | 0.8808 |

|                               |       |        |     |        |       |        |          |
|-------------------------------|-------|--------|-----|--------|-------|--------|----------|
| Male                          | 1,291 | 47.21% | 105 | 46.54% | 1,396 | 47.16% |          |
| Female                        | 1,801 | 52.79% | 143 | 53.46% | 1,944 | 52.84% |          |
| <b>Age</b>                    |       |        |     |        |       |        | p<0.0001 |
| Younger than 65               | 1,731 | 66.72% | 102 | 50.09% | 1,833 | 65.63% |          |
| 65 and Older                  | 1,361 | 33.28% | 146 | 49.91% | 1,507 | 34.37% |          |
| <b>Education</b>              |       |        |     |        |       |        | 0.0152   |
| No Secondary Education        | 769   | 29.23% | 46  | 18.77% | 815   | 28.55% |          |
| Secondary Education or Higher | 812   | 29.83% | 57  | 29.66% | 869   | 29.82% |          |
| Not Stated                    | 1,511 | 40.94% | 145 | 51.57% | 1,656 | 41.64% |          |
| <b>Rural-Urban Status</b>     |       |        |     |        |       |        | 0.074    |
| Urban                         | 1,199 | 48.78% | 84  | 40.67% | 1,283 | 48.25% |          |
| Rural                         | 1,893 | 51.22% | 164 | 59.33% | 2,057 | 51.75% |          |

|                           |                                                                |                       |                                                                 |                       |                          |                       |                 |
|---------------------------|----------------------------------------------------------------|-----------------------|-----------------------------------------------------------------|-----------------------|--------------------------|-----------------------|-----------------|
| <b>Smoking Status</b>     |                                                                |                       |                                                                 |                       |                          |                       | 0.2739          |
| Never Smoked              | 2,878                                                          | 91.56%                | 223                                                             | 91.14%                | 3,101                    | 91.53%                |                 |
| Current Smoker            | 121                                                            | 4.31%                 | 16                                                              | 6.34%                 | 137                      | 4.44%                 |                 |
| Former Smoker             | 21                                                             | 0.65%                 | 4                                                               | 0.75%                 | 25                       | 0.66%                 |                 |
| Not Stated                | 72                                                             | 3.48%                 | 5                                                               | 1.77%                 | 77                       | 3.37%                 |                 |
| <b>Waist-to-hip Ratio</b> | <i>Mean</i>                                                    | <i>Std Err</i>        | <i>Mean</i>                                                     | <i>Std Err</i>        | <i>Mean</i>              | <i>Std Err</i>        | 0.345*          |
|                           | 0.924                                                          | 0.003                 | 0.927                                                           | 0.005                 | 0.924                    | 0.002                 |                 |
| <b>Mexico Only</b>        |                                                                |                       |                                                                 |                       |                          |                       |                 |
|                           | <b>No Diagnosis or Symptoms of chronic respiratory disease</b> |                       | <b>Has Diagnosis or Symptoms of chronic respiratory disease</b> |                       | <b>Total</b>             |                       | <b>p-values</b> |
|                           | <b>Unweighted Counts</b>                                       | <b>Weighted Row %</b> | <b>Unweighted Counts</b>                                        | <b>Weighted Row %</b> | <b>Unweighted Counts</b> | <b>Weighted Row %</b> |                 |
| <b>Totals</b>             | 3,254                                                          | 82.46%                | 649                                                             | 17.54%                | 3,903                    | 100.00%               |                 |
|                           | <b>Unweighted Counts</b>                                       | <b>Weighted Col %</b> | <b>Unweighted Counts</b>                                        | <b>Weighted Col %</b> | <b>Unweighted Counts</b> | <b>Weighted Row %</b> |                 |

|                                     |       |        |     |        |       |        |        |
|-------------------------------------|-------|--------|-----|--------|-------|--------|--------|
| <b>Cooking Fuel</b>                 |       |        |     |        |       |        | 0.6796 |
| Wood/Charcoal/Coal/Kerosene         | 411   | 11.72% | 76  | 10.78% | 487   | 11.55% |        |
| Gas/Electricity                     | 2,843 | 88.28% | 573 | 89.22% | 3,416 | 88.45% |        |
| <b>Cooking Space</b>                |       |        |     |        |       |        | 0.0006 |
| Shared with Living/Sleeping Space   | 10    | 0.11%  | 5   | 0.66%  | 15    | 0.21%  |        |
| Separate from Living/Sleeping Space | 3244  | 99.89% | 644 | 99.34% | 3888  | 99.79% |        |
| <b>Sex</b>                          |       |        |     |        |       |        | 0.1511 |
| Male                                | 1,362 | 45.14% | 248 | 40.61% | 1,610 | 44.35% |        |
| Female                              | 1,892 | 54.86% | 401 | 59.39% | 2,293 | 55.65% |        |
| <b>Age</b>                          |       |        |     |        |       |        | 0.3161 |
| Younger than 65                     | 1,419 | 62.20% | 262 | 59.18% | 1,681 | 61.67% |        |
| 65 and Older                        | 1,835 | 37.80% | 387 | 40.82% | 2,222 | 38.33% |        |

|                               |       |        |     |        |       |        |        |
|-------------------------------|-------|--------|-----|--------|-------|--------|--------|
| <b>Education</b>              |       |        |     |        |       |        | 0.0123 |
| No Secondary Education        | 1,905 | 53.95% | 408 | 63.39% | 2,313 | 55.61% |        |
| Secondary Education or Higher | 826   | 32.94% | 141 | 22.27% | 967   | 31.07% |        |
| Not Stated                    | 523   | 13.10% | 100 | 14.34% | 623   | 13.32% |        |
| <b>Rural-Urban Status</b>     |       |        |     |        |       |        | 0.1515 |
| Urban                         | 2,360 | 78.08% | 488 | 82.44% | 2,848 | 78.85% |        |
| Rural                         | 894   | 21.92% | 161 | 17.56% | 1,055 | 21.15% |        |
| <b>Smoking Status</b>         |       |        |     |        |       |        | 0.4134 |
| Never Smoked                  | 2,465 | 73.69% | 476 | 78.13% | 2,941 | 74.47% |        |
| Current Smoker                | 300   | 12.37% | 80  | 10.65% | 380   | 12.07% |        |
| Former Smoker                 | 189   | 5.74%  | 31  | 4.19%  | 220   | 5.47%  |        |
| Not Stated                    | 300   | 8.20%  | 62  | 7.04%  | 362   | 8.00%  |        |

|                               |             |                |             |                |             |                |        |
|-------------------------------|-------------|----------------|-------------|----------------|-------------|----------------|--------|
| <b>Waist-to-hip<br/>Ratio</b> | <i>Mean</i> | <i>Std Err</i> | <i>Mean</i> | <i>Std Err</i> | <i>Mean</i> | <i>Std Err</i> | 0.497* |
|                               | 0.983       | 0.013          | 0.970       | 0.006          | 0.981       | 0.011          |        |

246 \*p-value obtained from F-test.

247



248 In Ghana, the overwhelming majority (87.39%) used solid fuels or kerosene as  
249 cooking fuels, compared to 12.61% who used gas or electricity. The bivariate association  
250 between cooking fuel and CRD status was significant ( $p=0.0005$ ), and of those who did not  
251 have a CRDs, 86.85% used solid fuels or kerosene, while 13.15% used LNG or electricity. In  
252 contrast, more (95.08%) people with symptoms or diagnoses used solid fuels or kerosene.  
253 The pattern of cooking fuel use differed in Mexico, where 88.45% of respondents used LNG  
254 or electricity, and was not associated with CRDs. Education was significantly associated with  
255 CRDs in both Ghana ( $p=0.0152$ ) and Mexico ( $p=0.0123$ ). In Ghana, age was significantly  
256 associated with CRDs, where, of those who had a CRDs, 49.91% were aged 65 or older,  
257 while among those who did not, only 33.28% were aged 65 or older.

## 258 **Model results**

259 The ICC, calculated with a multilevel logistic regression model with no predictors  
260 except for the random intercepts for countries, was found to be below our predetermined  
261 cutoff (ICC: 0.205; 95%CI: 0.198-0.212), and subsequently, we proceeded with conventional  
262 logistic regression models to estimate the effects of cooking fuel on CRDs.

263 Table 2 presents the results for the unadjusted association between cooking fuel and  
264 the odds of having CRDs. In Ghana, those who used unclean cooking fuels had higher odds  
265 of having CRDs (OR: 2.93; 95%CI: 1.57-5.46).

266

267 **Table 2. Unadjusted odds of reporting symptoms of chronic respiratory disease by primary household cooking fuel.**

|                                      | Ghana             |                |                                |                                | Mexico            |                |                                |                                |
|--------------------------------------|-------------------|----------------|--------------------------------|--------------------------------|-------------------|----------------|--------------------------------|--------------------------------|
|                                      | <i>Odds Ratio</i> | <i>p-value</i> | <i>95% CI:<br/>Lower Limit</i> | <i>95% CI:<br/>Upper Limit</i> | <i>Odds Ratio</i> | <i>p-value</i> | <i>95% CI:<br/>Lower Limit</i> | <i>95% CI:<br/>Upper Limit</i> |
| <b>Cooking Fuel</b>                  |                   |                |                                |                                |                   |                |                                |                                |
| Gas or Electricity                   | 1.00 (ref.)       | -              | -                              | -                              | 1.00 (ref.)       | -              | -                              | -                              |
| Wood, Charcoal, Coal, or<br>Kerosene | 2.93              | 0.001          | 1.57                           | 5.46                           | 0.910             | 0.680          | 0.58                           | 1.42                           |

268

269

270            This relationship continued to hold after adjusting for covariates (aOR: 2.74; 95%CI:  
271    1.33-5.65) and are presented in Table 3. In both unadjusted and adjusted models, cooking  
272    fuel was not associated with differences in CRD odds among those living in Mexico. In both  
273    Ghana and Mexico, education was associated with differences in CRD risk. In Mexico, those  
274    who did not complete secondary education or who did not state their education attainment  
275    had higher odds of CRDs, the adjusted odds ratios were respectively 2.06 (95%CI: 1.34-  
276    3.18) and 1.96 (95%CI: 1.19-3.22). In Ghana, having less than secondary education was  
277    associated with odds (aOR: 0.54; 95%CI: 0.32-0.91).

278 **Table 3. Adjusted odds of reporting symptoms of chronic respiratory disease by primary household cooking fuel. Stratified by**  
 279 **country.**

|                                        | <b>Ghana</b>      |                |                                |                                | <b>Mexico</b>     |                |                                |                                |
|----------------------------------------|-------------------|----------------|--------------------------------|--------------------------------|-------------------|----------------|--------------------------------|--------------------------------|
|                                        | <i>Odds Ratio</i> | <i>p-value</i> | <i>95% CI:<br/>Lower Limit</i> | <i>95% CI:<br/>Upper Limit</i> | <i>Odds Ratio</i> | <i>p-value</i> | <i>95% CI:<br/>Lower Limit</i> | <i>95% CI:<br/>Upper Limit</i> |
| <b>Cooking Fuel</b>                    |                   |                |                                |                                |                   |                |                                |                                |
| Gas or Electricity                     | 1.00 (ref.)       | -              | -                              | -                              | 1.00 (ref.)       | -              | -                              | -                              |
| Wood, Charcoal, Coal, or<br>Kerosene   | 2.74              | 0.007          | 1.33                           | 5.65                           | 1.02              | 0.934          | 0.60                           | 1.75                           |
| <b>Cooking Space</b>                   |                   |                |                                |                                |                   |                |                                |                                |
| Separate from Living/Sleeping<br>Space | 1.00 (ref.)       | -              | -                              | -                              | 1.00 (ref.)       | -              | -                              | -                              |
| Shared with Living/Sleeping Space      | 4.06              | 0.018          | 1.28                           | 12.85                          | 5.44              | 0.029          | 1.19                           | 24.76                          |
| <b>Sex</b>                             |                   |                |                                |                                |                   |                |                                |                                |

|                               |             |         |      |      |             |       |      |      |
|-------------------------------|-------------|---------|------|------|-------------|-------|------|------|
| Male                          | 1.00 (ref.) | -       | -    | -    | 1.00 (ref.) | -     | -    | -    |
| Female                        | 0.97        | 0.864   | 0.66 | 1.42 | 0.90        | 0.517 | 0.67 | 1.23 |
| <b>Age</b>                    |             |         |      |      |             |       |      |      |
| Younger than 65               | 1.00 (ref.) | -       | -    | -    | 1.00 (ref.) | -     | -    | -    |
| 65 and Older                  | 1.87        | <0.0001 | 1.36 | 2.56 | 0.99        | 0.962 | 0.76 | 1.29 |
| <b>Education</b>              |             |         |      |      |             |       |      |      |
| No Secondary Education        | 0.54        | 0.020   | 0.32 | 0.91 | 2.06        | 0.001 | 1.34 | 3.18 |
| Secondary Education or Higher | 1.00 (ref.) | -       | -    | -    | 1.00 (ref.) | -     | -    | -    |
| Not Stated                    | 0.86        | 0.495   | 0.56 | 1.32 | 1.96        | 0.008 | 1.19 | 3.22 |
| <b>Rural-Urban Status</b>     |             |         |      |      |             |       |      |      |
| Urban                         | 1.00 (ref.) | -       | -    | -    | 1.00 (ref.) | -     | -    | -    |
| Rural                         | 0.89        | 0.541   | 0.62 | 1.29 | 1.48        | 0.091 | 0.94 | 2.34 |
| <b>Smoking Status</b>         |             |         |      |      |             |       |      |      |
| Never Smoked                  | 1.00 (ref.) | -       | -    | -    | 1.00 (ref.) | -     | -    | -    |

|                           |      |       |      |      |      |       |      |      |
|---------------------------|------|-------|------|------|------|-------|------|------|
| Current Smoker            | 1.54 | 0.192 | 0.80 | 2.97 | 0.84 | 0.410 | 0.54 | 1.28 |
| Former Smoker             | 0.94 | 0.908 | 0.30 | 2.88 | 0.70 | 0.311 | 0.35 | 1.40 |
| Not Stated                | 0.61 | 0.373 | 0.21 | 1.81 | 0.84 | 0.505 | 0.51 | 1.39 |
|                           |      |       |      |      |      |       |      |      |
| <b>Hip-to-waist Ratio</b> | 1.66 | 0.469 | 0.42 | 6.65 | 0.91 | 0.194 | 0.78 | 1.05 |

280

281           Next, we conducted analyzed sex-stratified analyses for each country. In Ghana,  
282 females living in households that used solid fuels or kerosene had higher odds of CRDs  
283 (aOR: 2.60; 95%CI: 1.03-6.56). Females who cooked with solid fuels or kerosene and in a  
284 space shared with living/sleeping had a substantially higher risk for CRDs (aOR: 5.75;  
285 95%CI: 1.04-31.82). Female current smokers had higher odds of CRDs (aOR: 7.79; 95%CI:  
286 1.66-36.65). Males did not have significantly different risks by either smoking status, cooking  
287 fuel, or cooking space. Both females and males aged 65 and older had a higher risk,  
288 respectively having aORs 1.87 (95%CI: 1.36-2.56) and 1.86 (95%CI: 1.10-3.15). In Mexico,  
289 no significant differences in cooking fuel use were found for either females or males. As for  
290 cooking space, men living in households where solid fuels or kerosene was the primary  
291 cooking fuel and where the cooking space was shared with living/sleeping space had  
292 substantially higher odds of CRDs than those without (aOR: 9.39; 95%CI: 1.80-48.98).  
293 Women who did not complete secondary education and those who did not state their  
294 educational attainment both had higher odds of CRDs, respectively having adjusted odds  
295 ratios 2.51 (95%CI: 1.53-4.11) and 2.13 (95%CI: 1.17-3.90).

## 296 **Discussion**

297           This study conducted a cross-sectional analysis using the Wave 2 data from the  
298 SAGE project, focusing on adults aged 50+ in Ghana and Mexico, to examine the  
299 association between cooking fuels and CRD symptoms. We found that in Ghana, individuals  
300 using solid fuels or kerosene had a significantly higher risk of CRDs compared to those  
301 using cleaner fuels like gas or electricity. This association was particularly pronounced  
302 among females and in households where cooking and living spaces were shared. In  
303 contrast, in Mexico, no significant association was found between cooking fuel type and  
304 CRD symptoms.

## 305 **Comparison with prior literature**

306 While differing slightly in magnitude, the direction of the association between cooking  
307 fuel and CRD was similar to a prior Chinese study which found that solid fuels were  
308 associated with higher odds of CRDs (aOR: 1.30; 95%CI: 1.26-1.34). We note that this study  
309 differs from ours in that they only made comparisons between solid fuels and clean fuels  
310 (LNG, biogas, and electricity). As for gender differences, in Mexico, men living in households  
311 using solid cooking fuels and kerosene were associated with a higher risk of CRDs  
312 compared to women in similar settings. This finding contrasts to prior studies from other  
313 contexts that assign greater risks to women (58–60). A provisional explanation for this  
314 finding is that women might underreport their symptoms due to cultural norms or other  
315 societal factors, leading to an apparent lower risk in women when compared to men.  
316 Likewise, men may have additional exposure to respiratory irritants and pollutants through  
317 their occupational activities. If these exposures are more prevalent or intense than those  
318 experienced by women, they could contribute to the higher risk of CRDs observed in men.  
319

## 320 **Strengths and limitations**

321 There are some limitations associated with this study. First, due to its cross-sectional  
322 nature, the relationship between cooking fuel use and NCD is associational, and causality  
323 cannot be directly inferred from this study. However, as future waves of the SAGE study  
324 become available, longitudinal evidence may be obtained from the same population, which  
325 could help to establish temporal relationships and potentially infer causality. Second, the  
326 measure for CRD symptoms is subject to recall bias which may result in milder to moderate  
327 CRD symptoms being underreported, biasing our results towards the null.

328 This study boasts several notable strengths that reinforce the validity and importance  
329 of its findings. First, it leverages the comprehensive and standardized data collection  
330 framework of the SAGE study, ensuring consistency and reliability across a diverse sample.



331 The large sample size, encompassing a broad demographic of older adults from Ghana and  
332 Mexico, enhances the generalizability of the results to similar contexts. Moreover, the  
333 inclusion of both self-reported symptoms and medical diagnoses in our outcome measure  
334 provides a comprehensive view of CRDs, balancing subjective and objective assessments.  
335 These methodological strengths collectively ensure that our study makes a significant  
336 contribution to the existing literature on environmental health and CRDs, particularly in the  
337 context of aging populations in low- and middle-income countries.

## 338 **Conclusion**

339 In conclusion, this study provides critical insights into the relationship between  
340 household cooking fuel use and chronic respiratory diseases in older adults, particularly in  
341 the contexts of Ghana and Mexico. The findings are especially pertinent to public health  
342 policymakers and environmental health authorities, offering valuable evidence to guide  
343 interventions aimed at reducing the burden of CRDs. Our findings highlight the importance of  
344 increasing the accessibility of clean cooking methods (i.e., LPG and electricity) to reduce  
345 household air pollution and subsequent symptoms of CRDs. Healthcare providers can also  
346 benefit from these insights, as they provide an important perspective considering household  
347 environmental factors in the management and prevention of respiratory ailments. Ultimately,  
348 this study underscores the importance of addressing environmental determinants of health to  
349 improve outcomes for aging populations in LMICs.

350

351

352

353

354

## 355 **References**

- 356 1. Chronic respiratory diseases [Internet]. [cited 2023 Dec 7]. Available from:  
357 <https://www.who.int/health-topics/chronic-respiratory-diseases>
- 358 2. Labaki WW, Han MK. Chronic respiratory diseases: a global view. *Lancet Respir Med*.  
359 2020 Jun 1;8(6):531–3.
- 360 3. Thiadens HA, Bock GH de, Dekker FW, Huysman J a. N, Houwelingen JC van, Springer  
361 MP, et al. Identifying asthma and chronic obstructive pulmonary disease in patients with  
362 persistent cough presenting to general practitioners: descriptive study. *BMJ*. 1998 Apr  
363 25;316(7140):1286–90.
- 364 4. Landt E, Çolak Y, Lange P, Laursen LC, Nordestgaard BG, Dahl M. Chronic Cough in  
365 Individuals With COPD. *Chest*. 2020 Jun;157(6):1446–54.
- 366 5. Patel JG, Nagar SP, Dalal AA. Indirect costs in chronic obstructive pulmonary disease: A  
367 review of the economic burden on employers and individuals in the United States. *Int J*  
368 *Chron Obstruct Pulmon Dis*. 2014 Mar 19;9:289–300.
- 369 6. Beran D, Zar HJ, Perrin C, Menezes AM, Burney P. Burden of asthma and chronic  
370 obstructive pulmonary disease and access to essential medicines in low-income and  
371 middle-income countries. *Lancet Respir Med*. 2015 Feb 1;3(2):159–70.
- 372 7. Brakema EA, Tabyshova A, van der Kleij RMJJ, Sooronbaev T, Lionis C, Anastasaki M,  
373 et al. The socioeconomic burden of chronic lung disease in low-resource settings across  
374 the globe – an observational FRESH AIR study. *Respir Res*. 2019 Dec 21;20(1):291.
- 375 8. Chronic respiratory diseases [Internet]. [cited 2023 Dec 14]. Available from:  
376 <https://www.who.int/health-topics/chronic-respiratory-diseases>
- 377 9. Adeloye D, Chua S, Lee C, Basquill C, Papan A, Theodoratou E, et al. Global and  
378 regional estimates of COPD prevalence: Systematic review and meta-analysis. *J Glob*  
379 *Health*. 5(2):020415.
- 380 10. Varmaghani M, Dehghani M, Heidari E, Sharifi F, Saeedi Moghaddam S, Farzadfar  
381 F. Global prevalence of chronic obstructive pulmonary disease: systematic review and

- 382 meta-analysis. *East Mediterr Health J.* 2019 Jan 1;25(1):47–57.
- 383 11. López-Campos JL, Tan W, Soriano JB. Global burden of COPD. *Respirology.*  
384 2016;21(1):14–23.
- 385 12. Martins P, Rosado-Pinto J, Do Céu Teixeira M, Neuparth N, Silva O, Tavares H, et  
386 al. Under-report and underdiagnosis of chronic respiratory diseases in an African country.  
387 *Allergy.* 2009;64(7):1061–7.
- 388 13. Ho T, Cusack RP, Chaudhary N, Satia I, Kurmi OP. Under- and over-diagnosis of  
389 COPD: a global perspective. *Breathe.* 2019 Mar;15(1):24–35.
- 390 14. Safiri S, Carson-Chahhoud K, Noori M, Nejadghaderi SA, Sullman MJM, Ahmadian  
391 Heris J, et al. Burden of chronic obstructive pulmonary disease and its attributable risk  
392 factors in 204 countries and territories, 1990-2019: results from the Global Burden of  
393 Disease Study 2019. *BMJ.* 2022 Jul 27;e069679.
- 394 15. Patadia MO, Murrill LL, Corey J. Asthma. *Otolaryngol Clin North Am.* 2014  
395 Feb;47(1):23–32.
- 396 16. Asher MI, García-Marcos L, Pearce NE, Strachan DP. Trends in worldwide asthma  
397 prevalence. *Eur Respir J.* 2020 Dec;56(6):2002094.
- 398 17. Oraka E, Kim HJE, King ME, Callahan DB. Asthma Prevalence among US Elderly by  
399 Age Groups: Age Still Matters. *J Asthma.* 2012 Aug 1;49(6):593–9.
- 400 18. Savage-Brown A, Mannino D, Redd S. Lung Disease and Asthma Severity in Adults  
401 with Asthma: Data from the Third National Health and Nutrition Examination. *J Asthma.*  
402 2005 Jul 1;42(6):519–23.
- 403 19. Song P, Adedoye D, Salim H, Dos Santos JP, Campbell H, Sheikh A, et al. Global,  
404 regional, and national prevalence of asthma in 2019: a systematic analysis and modelling  
405 study. *J Glob Health.* 12:04052.
- 406 20. Murgia N, Gambelunghe A. Occupational COPD—The most under-recognized  
407 occupational lung disease? *Respirology.* 2022;27(6):399–410.
- 408 21. Maron BA, Choudhary G, Khan UA, Jankowich MD, McChesney H, Ferrazzani SJ, et  
409 al. Clinical Profile and Underdiagnosis of Pulmonary Hypertension in US Veteran

- 410 Patients. *Circ Heart Fail*. 2013 Sep;6(5):906–12.
- 411 22. Sohn KH, Song WJ, Kim SH, Jang HC, Kim KW, Chang YS. Chronic cough, not  
412 asthma, is associated with depression in the elderly: a community-based population  
413 analysis in South Korea. *Korean J Intern Med*. 2019 Nov;34(6):1363–71.
- 414 23. Carreiro-Martins P, Gomes-Belo J, Papoila AL, Caires I, Palmeiro T, Gaspar-  
415 Marques J, et al. Chronic respiratory diseases and quality of life in elderly nursing home  
416 residents. *Chron Respir Dis*. 2016 Aug 1;13(3):211–9.
- 417 24. Enright PL, Kronmal RA, Higgins MW, Schenker MB, Haponik EF. Prevalence and  
418 Correlates of Respiratory Symptoms and Disease in the Elderly. *Chest*. 1994  
419 Sep;106(3):827–34.
- 420 25. Anderson DO, Ferris BG. Role of Tobacco Smoking in the Causation of Chronic  
421 Respiratory Disease. *N Engl J Med*. 1962 Oct 18;267(16):787–94.
- 422 26. Heederik D, Kromhout H, Kromhout D, Burema J, Biersteker K. Relations between  
423 occupation, smoking, lung function, and incidence and mortality of chronic non-specific  
424 lung disease: the Zutphen Study. *Occup Environ Med*. 1992 May 1;49(5):299–308.
- 425 27. Nkosi V, Wichmann J, Voyi K. Chronic respiratory disease among the elderly in  
426 South Africa: any association with proximity to mine dumps? *Environ Health*. 2015  
427 Dec;14(1):33.
- 428 28. Shin S, Bai L, Burnett RT, Kwong JC, Hystad P, van Donkelaar A, et al. Air Pollution  
429 as a Risk Factor for Incident Chronic Obstructive Pulmonary Disease and Asthma. A 15-  
430 Year Population-based Cohort Study. *Am J Respir Crit Care Med*. 2021  
431 May;203(9):1138–48.
- 432 29. Gangwar RS, Vinayachandran V, Rengasamy P, Chan R, Park B, Diamond-Zaluski  
433 R, et al. Differential contribution of bone marrow-derived infiltrating monocytes and  
434 resident macrophages to persistent lung inflammation in chronic air pollution exposure.  
435 *Sci Rep*. 2020 Sep 1;10(1):14348.
- 436 30. Dahl M, Vestbo J, Lange P, Bojesen SE, Tybjaerg-Hansen A, Nordestgaard BG. C-  
437 reactive Protein As a Predictor of Prognosis in Chronic Obstructive Pulmonary Disease.

- 438 Am J Respir Crit Care Med. 2007 Feb;175(3):250–5.
- 439 31. Chafe ZA, Brauer M, Klimont Z, Van Dingenen R, Mehta S, Rao S, et al. Household  
440 Cooking with Solid Fuels Contributes to Ambient PM<sub>2.5</sub> Air Pollution and the Burden of  
441 Disease. *Environ Health Perspect*. 2014 Dec;122(12):1314–20.
- 442 32. Williams A, Jones JM, Ma L, Pourkashanian M. Pollutants from the combustion of  
443 solid biomass fuels. *Prog Energy Combust Sci*. 2012 Apr 1;38(2):113–37.
- 444 33. Raqib R, Akhtar E, Sultana T, Ahmed S, Chowdhury MAH, Shahriar MH, et al.  
445 Association of household air pollution with cellular and humoral immune responses  
446 among women in rural Bangladesh. *Environ Pollut*. 2022 Apr 15;299:118892.
- 447 34. Balmes JR. Household air pollution from domestic combustion of solid fuels and  
448 health. *J Allergy Clin Immunol*. 2019 Jun;143(6):1979–87.
- 449 35. Chahal A, Multani N, Rao H. Impact of Therapeutic Interventions in Patients of  
450 Osteoporosis. *Indian J Physiother Occup Ther - Int J*. 2016 Jan 1;10:61.
- 451 36. C. Kaplan. Indoor Air Pollution from Unprocessed Solid Fuels in Developing  
452 Countries. *Rev Environ Health*. 2010 Sep 1;25(3):221–42.
- 453 37. Liu J, Hou B, Ma XW, Liao H. Solid fuel use for cooking and its health effects on the  
454 elderly in rural China. *Environ Sci Pollut Res*. 2018 Feb 1;25(4):3669–80.
- 455 38. Chan KH, Kurmi OP, Bennett DA, Yang L, Chen Y, Tan Y, et al. Solid Fuel Use and  
456 Risks of Respiratory Diseases. A Cohort Study of 280,000 Chinese Never-Smokers. *Am J*  
457 *Respir Crit Care Med*. 2019 Feb;199(3):352–61.
- 458 39. Smith KR, Pillarisetti A. Household Air Pollution from Solid Cookfuels and Its Effects  
459 on Health. In: Mock CN, Nugent R, Kobusingye O, Smith KR, editors. *Injury Prevention*  
460 *and Environmental Health [Internet]*. 3rd ed. Washington (DC): The International Bank for  
461 *Reconstruction and Development / The World Bank*; 2017 [cited 2023 Dec 14]. Available  
462 from: <http://www.ncbi.nlm.nih.gov/books/NBK525225/>
- 463 40. Karimu A. Cooking fuel preferences among Ghanaian Households: An empirical  
464 analysis. *Energy Sustain Dev*. 2015 Aug 1;27:10–7.
- 465 41. Saenz JL. Solid cooking fuel use and cognitive decline among older Mexican adults.

- 466 Indoor Air. 2021;31(5):1522–32.
- 467 42. SAGE Waves [Internet]. [cited 2023 Aug 2]. Available from:  
468 [https://www.who.int/data/data-collection-tools/study-on-global-ageing-and-adult-](https://www.who.int/data/data-collection-tools/study-on-global-ageing-and-adult-health/sage-waves)  
469 [health/sage-waves](https://www.who.int/data/data-collection-tools/study-on-global-ageing-and-adult-health/sage-waves)
- 470 43. Arokiasamy P, Uttamacharya, Kowal P, Capistrant BD, Gildner TE, Thiele E, et al.  
471 Chronic Noncommunicable Diseases in 6 Low- and Middle-Income Countries: Findings  
472 From Wave 1 of the World Health Organization’s Study on Global Ageing and Adult  
473 Health (SAGE). *Am J Epidemiol*. 2017 Mar 15;185(6):414–28.
- 474 44. Çolak Y, Afzal S. Prognostic significance of chronic respiratory symptoms in  
475 individuals with normal spirometry. *Eur Respir J* [Internet]. 2020 Jan 1 [cited 2023 Dec  
476 13];55(1). Available from: <https://erj.ersjournals.com/content/55/1/1902226>
- 477 45. Aaron SD, Tan WC, Bourbeau J, Sin DD, Loves RH, MacNeil J, et al. Diagnostic  
478 Instability and Reversals of Chronic Obstructive Pulmonary Disease Diagnosis in  
479 Individuals with Mild to Moderate Airflow Obstruction. *Am J Respir Crit Care Med*. 2017  
480 Aug;196(3):306–14.
- 481 46. Stavem K, Johannessen A, Nielsen R, Gulsvik A. Respiratory symptoms and  
482 respiratory deaths: A multi-cohort study with 45 years observation time. *PLOS ONE*. 2021  
483 Nov 22;16(11):e0260416.
- 484 47. Blaylock JR, Blisard WN. Self-evaluated health status and smoking behaviour. *Appl*  
485 *Econ*. 1992 Apr;24(4):429–35.
- 486 48. Guitérrez-Bedmar M, Seguí-Gómez M, Gómez-Gracia E, Bes-Rastrollo M, Martínez-  
487 González M. Smoking Status, Changes in Smoking Status and Health-Related Quality of  
488 Life: Findings from the SUN (“Seguimiento Universidad de Navarra”) Cohort. *Int J Environ*  
489 *Res Public Health*. 2009 Jan 19;6(1):310–20.
- 490 49. Laaksonen M, Rahkonen O, Martikainen P, Karvonen S, Lahelma E. Smoking and  
491 SF-36 health functioning. *Prev Med*. 2006 Mar;42(3):206–9.
- 492 50. Mody RR, Smith MJ. Smoking Status and Health-Related Quality of Life: Findings  
493 from the 2001 Behavioral Risk Factor Surveillance System Data. *Am J Health Promot*.

- 494 2006 Mar;20(4):251–8.
- 495 51. Vestbo J, Hurd SS, Agustí AG, Jones PW, Vogelmeier C, Anzueto A, et al. Global  
496 Strategy for the Diagnosis, Management, and Prevention of Chronic Obstructive  
497 Pulmonary Disease: GOLD Executive Summary. *Am J Respir Crit Care Med*. 2013 Feb  
498 15;187(4):347–65.
- 499 52. Sethi JM, Rochester CL. SMOKING AND CHRONIC OBSTRUCTIVE PULMONARY  
500 DISEASE. *Clin Chest Med*. 2000 Mar 1;21(1):67–86.
- 501 53. Myint PK, Kwok CS, Luben RN, Wareham NJ, Khaw KT. Body fat percentage, body  
502 mass index and waist-to-hip ratio as predictors of mortality and cardiovascular disease.  
503 *Heart*. 2014 Oct 15;100(20):1613–9.
- 504 54. Li C, Engström G, Hedblad B, Calling S, Berglund G, Janzon L. Sex differences in  
505 the relationships between BMI, WHR and incidence of cardiovascular disease: a  
506 population-based cohort study. *Int J Obes*. 2006 Dec;30(12):1775–81.
- 507 55. Cicchetti DV. Guidelines, criteria, and rules of thumb for evaluating normed and  
508 standardized assessment instruments in psychology. *Psychol Assess*. 1994  
509 Dec;6(4):284–90.
- 510 56. Koo TK, Li MY. A Guideline of Selecting and Reporting Intraclass Correlation  
511 Coefficients for Reliability Research. *J Chiropr Med*. 2016 Jun;15(2):155–63.
- 512 57. Stata Statistical Software: Release 18. College Station, TX: StataCorp; 2023.
- 513 58. Faizan MA, Thakur R. Association Between Solid Cooking Fuels and Respiratory  
514 Disease Across Socio-Demographic Groups in India. *J Health Pollut*. 2019 Sep  
515 1;9(23):190911.
- 516 59. Pinkerton KE, Harbaugh M, Han MK, Jourdan Le Saux C, Van Winkle LS, Martin WJ,  
517 et al. Women and Lung Disease. Sex Differences and Global Health Disparities. *Am J*  
518 *Respir Crit Care Med*. 2015 Jul;192(1):11–6.
- 519 60. Jenkins C. Differences Between Men and Women with Chronic Obstructive  
520 Pulmonary Disease. *Clin Chest Med*. 2021 Sep;42(3):443–56.
